# Supplementary material for: Intrinsically dominated anomalous Hall effect in pulsed laser deposited epitaxial Co2MnGe ferromagnetic full Heusler alloy thin films
Source: Royal Society of Chemistry journal article supplement (doi:10.1039/d3ra06132a), 2023-01-01
Supplement: d3ra06132a1.pdf [file d3ra06132a1.pdf]

## Supplementary information

### Intrinsically dominated anomalous Hall effect in pulsed laser deposited epitaxial $\text{Co}_2\text{MnGe}$ ferromagnetic full Heusler alloy thin films

Ekta Yadav and Sunil Kumar\*

Department of Physics, Indian Institute of Technology Delhi, New Delhi 110016, INDIA

\*Corresponding Author: kumarsunil@physics.iitd.ac.in

#### S1: Anomalous Hall resistivity and anomalous Hall coefficient

The temperature dependent anomalous Hall resistivity,  $\rho_{xy}^{AHE}$  is presented in **Fig. S1(a)**, where a monotonic increase with the temperature can be seen in the entire range of 5-300K. The anomalous Hall coefficient,  $R_S$  was calculated by using the relation,  $\rho_{xy}^{AHE} = 4\pi R_S M$  and **Fig. S2(b)** presents the corresponding results at each of the sample temperatures.

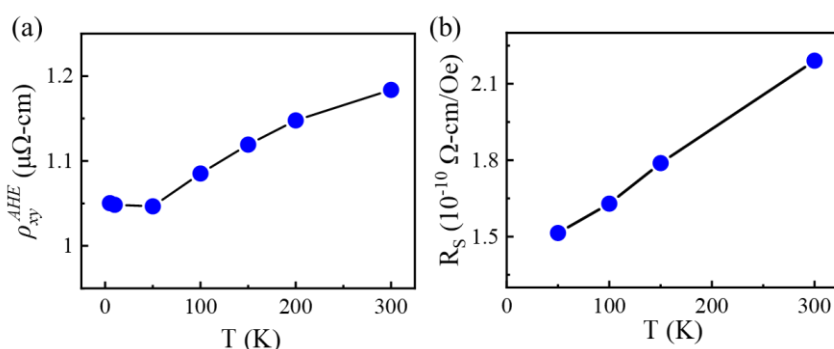

**Figure S1:** (a) Anomalous Hall resistivity,  $\rho_{xy}^{AHE}$  as a function of sample temperature. (b) Anomalous Hall coefficient,  $R_S$  at varying sample temperatures.

#### S2: Compositional analysis by electron probe microanalysis

**Figure S2** shows the results from electron probe microanalysis (EPMA) for compositional analysis of the  $\text{Co}_2\text{MnGe}$  film. The summary of the elemental analysis in terms of atomic % is provided in the associated tabular form. The result clearly indicates uniform material stoichiometry in the film. The data presented in the figure is an average of 4 measurements on different points on the sample.

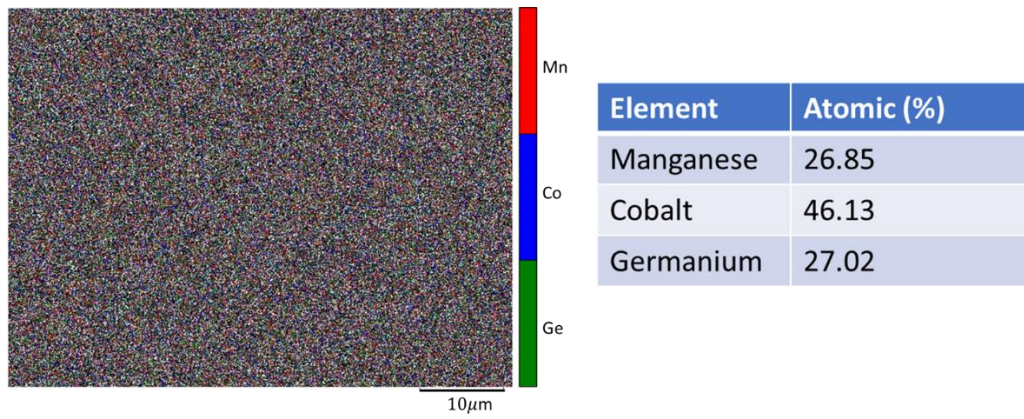

**Figure S2:** Combined elemental mapping of Co, Mn and Ge from EPMA. The corresponding results for the atomic % of the elements present are provided in the tabular form.
